# Supplementary material for: Portanini (Insecta: Hemiptera: Cicadellidae) from Peru: checklist with new records and descriptions of two new species
Source: PeerJ. 2020 Dec 11;8:e10222. doi: 10.7717/peerj.10222 (PMC7735076; doi:10.7717/peerj.10222)
Supplement: Supplemental Information 1 — Raw data of total body length, forewing length, interocular width, transocular width, maximum pronotum width, and crown length for each specimen in type series. Asterisk (*) denotes holotype. [file peerj-08-10222-s001.xlsx]

## Sheet: Plan1
		Body length	Forewing length	Interocular width	Transocular width	Maximum pronotum width	Crown length
M. mamaquilla sp. nov
Cicadell-JGA-005-MUSM	*male	5.693	4.586	0.591	1.258	1.353	0.378
DZRJ-AUCH-125	male	5.612	4.439	0.552	1.218	1.266	0.373
Cicadell-JGA-003-MUSM	male	5.734	4.534	0.573	1.269	1.27	0.434
Cicadell-JGA-006-MUSM	male	6.004	4.857	0.588	1.293	1.427	0.373
	male	5.555	4.492	0.571	1.267	1.394	0.365
	male	5.452	4.445	0.616	1.283	1.324	0.409
DZRJ-AUCH-124	male	5.874	4.634	0.599	1.307	1.37	0.363
DZRJ-AUCH-126	male	5.906	4.73	0.635	1.331	1.417	0.444
DZRJ-AUCH-127	male	5.772	4.562	0.575	1.258	1.328	0.427
DZRJ-AUCH-128	male	5.554	4.45	0.569	1.255	1.322	0.333
Cicadell-JGA-007-MUSM	male	5.838	4.602	0.599	1.288	1.418	0.439
	male	5.58	4.479	0.558	1.223	1.292	0.4
	male	5.459	4.314	0.548	1.259	1.395	0.414
DZRJ-AUCH-122	female	6.28	5.141	0.628	1.372	1.457	0.367
DZRJ-AUCH-123	female	5.953	4.818	0.622	1.418	1.427	0.452
Cicadell-JGA-004-MUSM	female	6.001	4.913	0.644	1.384	1.476	0.346
	female	6.316	5.201	0.674	1.434	1.567	0.431
	female	6.26	5.238	0.67	1.423	1.519	0.456
P. tambopata sp. nov
	*male	4.533	3.573	0.55	1.109	1.11	0.38
	male	4.561	3.507	0.52	1.094	1.05	0.431
DZRJ-AUCH-159	male	4.481	3.61	0.509	1.055	1.03	0.425
DZRJ-AUCH-160	male	4.307	3.286	0.511	1.069	1.024	0.432
Cicadell-JGA-009-MUSM	male	4.829	3.596	0.515	1.058	1.051	0.427
	female	4.557	3.517	0.561	1.158	1.107	0.415
DZRJ-AUCH-161	female	4.744	3.746	0.576	1.159	1.108	0.436
